# Supplementary material for: Increasing tuberculosis burden in Latin America: an alarming trend for global control efforts
Source: HighWire-hosted journal article supplement (doi:10.1136/bmjgh-2021-005639), 2021-03-01
Supplement: bmjgh-2021-005639supp001_data_supplement.pdf [file bmjgh-2021-005639supp001_data_supplement.pdf]

## **Supplementary material**

### **Increasing Tuberculosis burden in Latin America: an alarming trend for global TB control efforts**

eFigure 1. Estimated incidence of tuberculosis between WHO Regions between 2000 to 2019

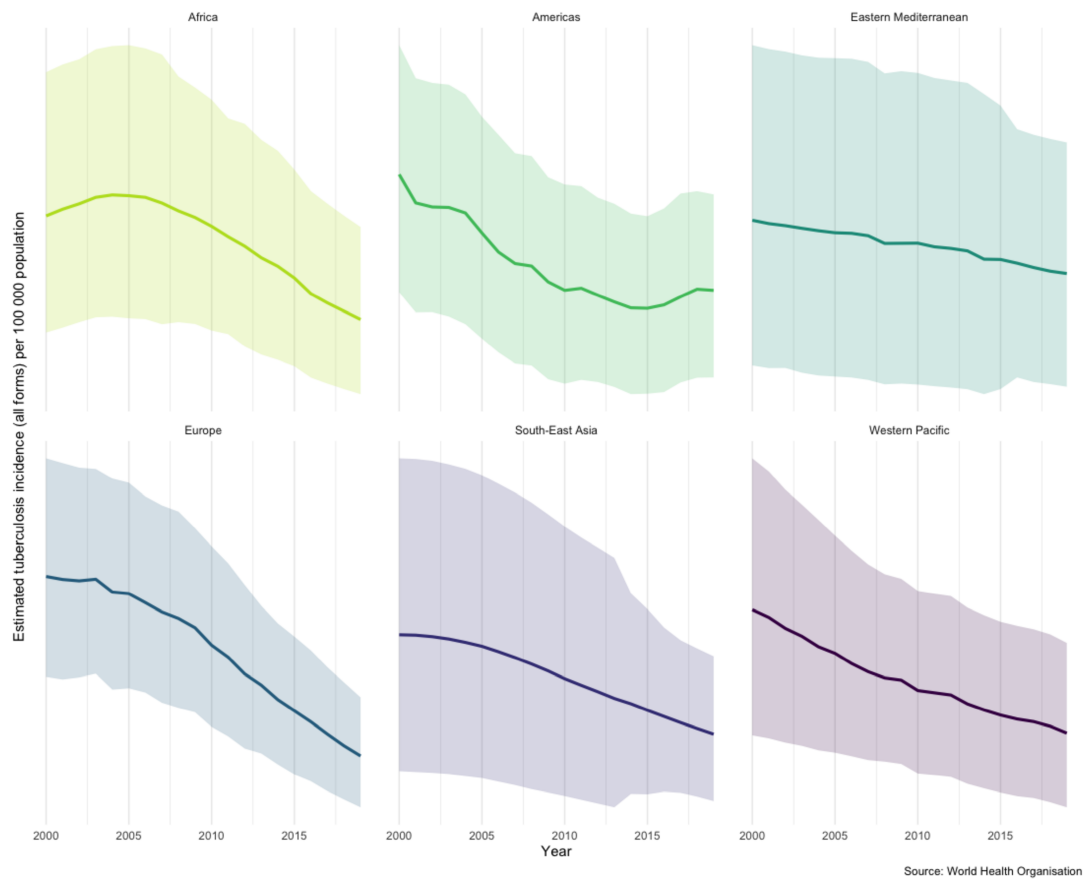

\* Figure built with the `plot_tb_burden_summary` function from the package `getTBinR`

eFigure 2. Estimated incidence of tuberculosis and case notification among 12 countries from Latin America between 2000 to 2019

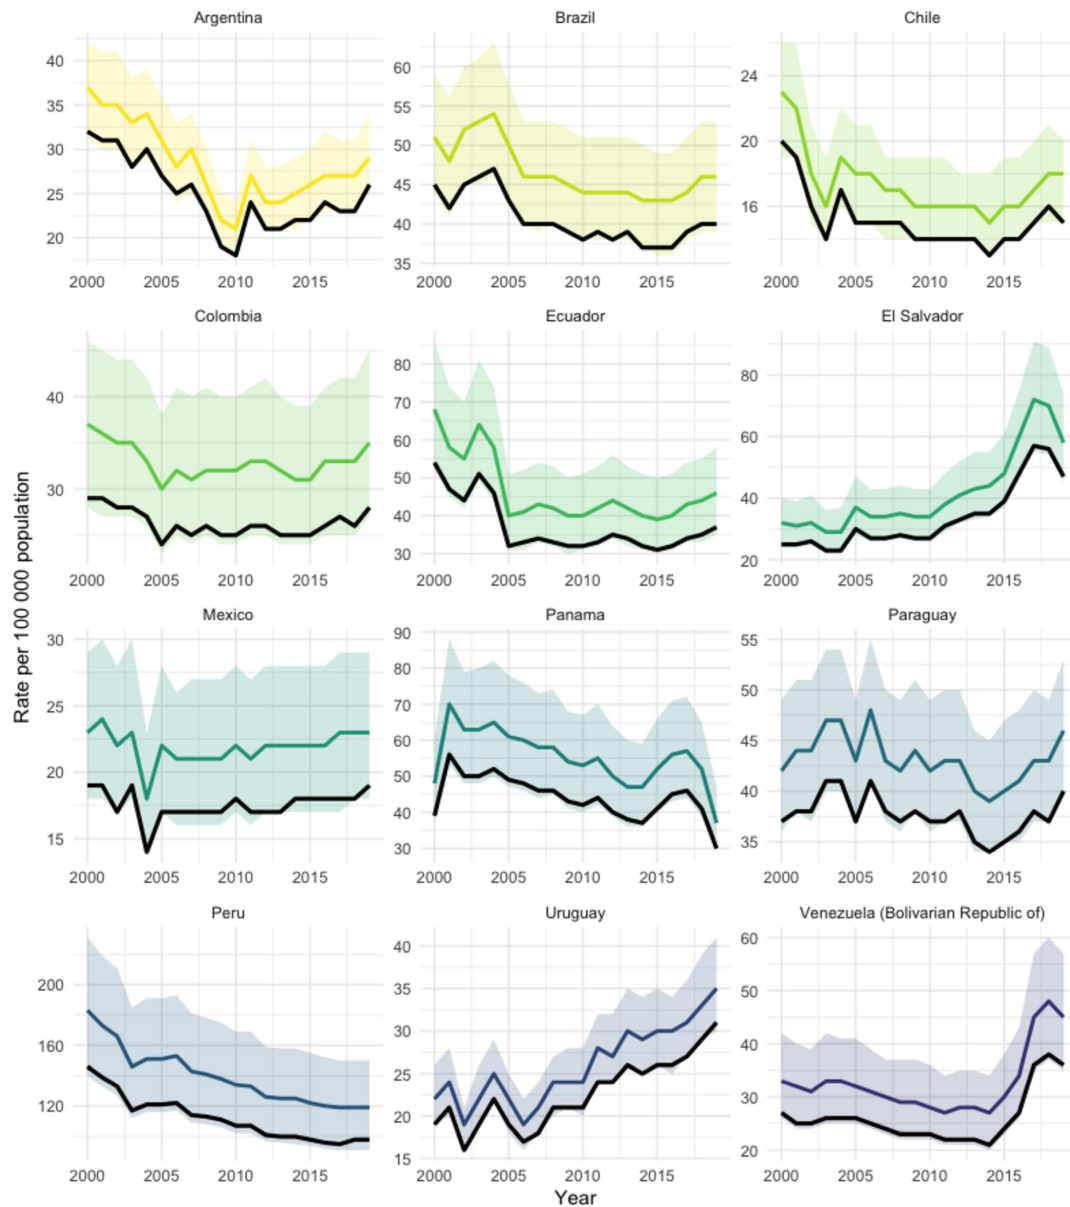

Coloured lines: Estimated tuberculosis incidence (all forms), shadow represents 95% confidence intervals. Black lines: Tuberculosis case notification
